# Supplementary figures and images for: Host-Primed Ebola Virus GP Exposes a Hydrophobic NPC1 Receptor-Binding Pocket, Revealing a Target for Broadly Neutralizing Antibodies
Source: PubMed Central journal article supplement — mBio. 2016 Feb 23;7(1):e02154-15. doi: 10.1128/mBio.02154-15 (PMC4791852; doi:10.1128/mbio.02154-15), 2016-02-23

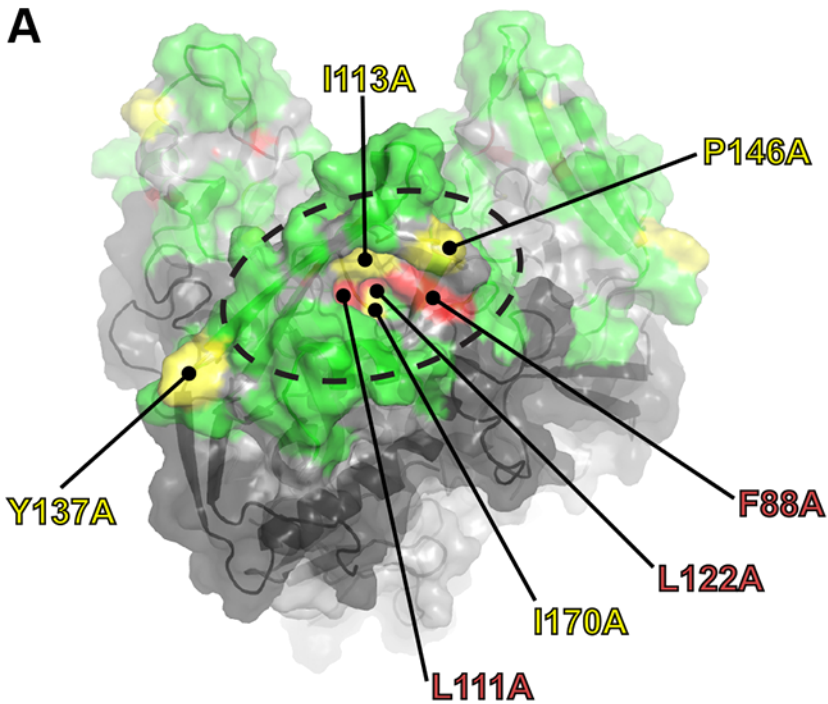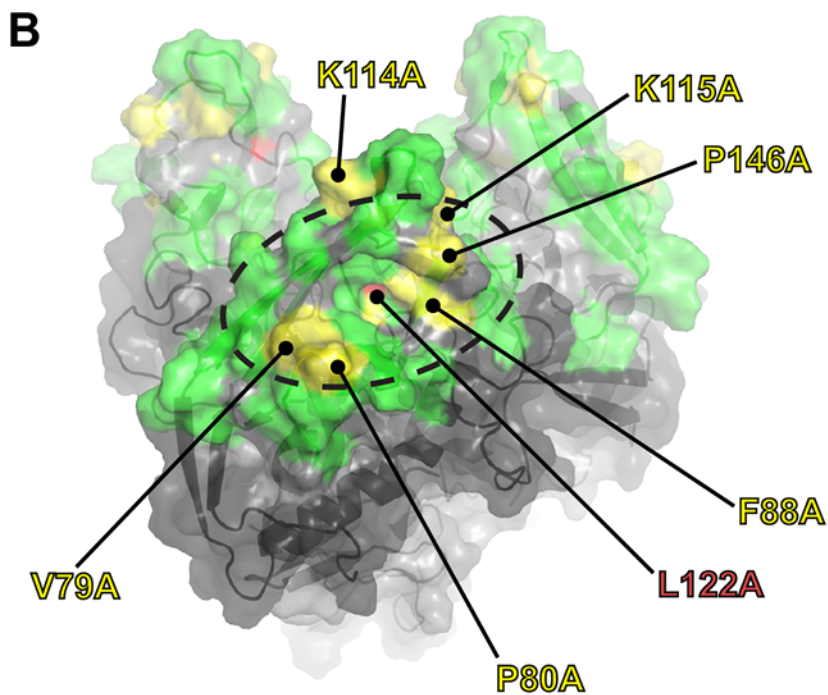

**Figure S1**

Supplement: mbo001162696sf1.pdf [file mbo001162696sf1.pdf]
